# Supplementary material for: Associations between remote patient monitoring programme responsiveness and clinical outcomes for patients with COVID-19
Source: PubMed Central journal article supplement — BMJ Open Qual. 2021 Sep 13;10(3):e001496. doi: 10.1136/bmjoq-2021-001496 (PMC8438571; doi:10.1136/bmjoq-2021-001496), 2021-09-13
Supplement: bmjoq-2021-001496supp001.pdf [file bmjoq-2021-001496supp001.pdf]

Supplemental Table 1. Remote patient monitoring program survey questions as of February 15, 2021.

| <b>Initial Medical History Survey Questions</b>                                                                          |
|--------------------------------------------------------------------------------------------------------------------------|
| <b>Are you male or female?</b>                                                                                           |
| <b>Are you pregnant?</b>                                                                                                 |
| <b>What was the first day of your last menstrual period?</b>                                                             |
| <b>What is your pregnancy due date?</b>                                                                                  |
| <b>Is your period late?</b>                                                                                              |
| <b>When was your last period expected?</b>                                                                               |
| <b>Is your OB aware of your COVID-19 diagnosis?</b>                                                                      |
| <b>Are you currently being treated for cancer?</b>                                                                       |
| <b>Have you been diagnosed with HIV or AIDS?</b>                                                                         |
| <b>Do you take any medication that weakens your immune system like prednisone, Humira, Orencia, Enbrel, or Imuran?</b>   |
| <b>Have you been told by a doctor or healthcare provider that you have a condition that hurts your memory?</b>           |
| <b>How long have you taken immune suppression medications?</b>                                                           |
| <b>Why do you take immune suppression medications?</b>                                                                   |
| <b>Are you currently being treated?</b>                                                                                  |
| <b>How long have you had cancer of malignancy?</b>                                                                       |
| <b>What is the severity of your cancer or malignancy?</b>                                                                |
| <b>How long have you had coronary artery disease?</b>                                                                    |
| <b>What is the severity of your coronary artery disease?</b>                                                             |
| <b>What is the status of your coronary artery disease?</b>                                                               |
| <b>How long have you had heart failure?</b>                                                                              |
| <b>What is the severity of your heart failure?</b>                                                                       |
| <b>What is the status of your heart failure?</b>                                                                         |
| <b>Do you currently have a chronic illness making it hard to think clearly or remember information such as dementia?</b> |
| <b>Were you admitted to the hospital for COVID-19 or suspected COVID-19?</b>                                             |
| <b>What hospital were you admitted to?</b>                                                                               |
| <b>When were you admitted to the hospital?</b>                                                                           |
| <b>When were you discharged from the hospital?</b>                                                                       |

|                                                                                                                              |
|------------------------------------------------------------------------------------------------------------------------------|
| <b>Were you in the ICU or Intensive Care Unit?</b>                                                                           |
| <b>Were you intubated?</b>                                                                                                   |
| <b>Were you diagnosed with pneumonia during your COVID-19 illness?</b>                                                       |
|                                                                                                                              |
| <b>Initial Health Status Survey Questions</b>                                                                                |
| <b>If you were told to isolate yourself and not get other people sick, when did that start?</b>                              |
| <b>What are your current limitations?</b>                                                                                    |
| <b>Where there any changes to your limitations recently?</b>                                                                 |
| <b>Do you have anything that limits your ability to complete everyday tasks?</b>                                             |
| <b>Before you were ill, did you need help with activities of daily living such as shopping, getting dressed, or cooking?</b> |
| <b>Have you ever been diagnosed with a mental or behavioral health condition such as schizophrenia or depression?</b>        |
| <b>Before you were ill, did you have trouble affording groceries?</b>                                                        |
| <b>Do you feel safe where you live?</b>                                                                                      |
| <b>Do you have anything else that makes life harder?</b>                                                                     |
| <b>Where do you currently live?</b>                                                                                          |
| <b>Who do you currently live with?</b>                                                                                       |
| <b>Do you have a caretaker or someone that can help take care of you?</b>                                                    |
| <b>Who is your caregiver?</b>                                                                                                |
| <b>What is your caregiver's health status?</b>                                                                               |
| <b>Were there any changes to your caregiver's limitations recently?</b>                                                      |
| <b>Do you have a spouse?</b>                                                                                                 |
| <b>What is your spouse's age?</b>                                                                                            |
| <b>Please rate your symptoms overall.</b>                                                                                    |
| <b>How would you describe your symptoms?</b>                                                                                 |
| <b>Have you traveled outside of Georgia in the past 21 days?</b>                                                             |
| <b>Where did you travel?</b>                                                                                                 |
| <b>Did you have contact with anyone confirmed positive for COVID-19?</b>                                                     |
| <b>What is your relationship to the person confirmed positive for COVID-19?</b>                                              |
| <b>Who exactly from your household members is confirmed positive for COVID-19?</b>                                           |
| <b>When did you have your most recent contact with a person confirmed positive for COVID-19?</b>                             |

|                                                                                |
|--------------------------------------------------------------------------------|
| <b>Did you have contact with anyone suspected to be positive for COVID-19?</b> |
| <b>Was your spouse suspected to be positive for COVID-19?</b>                  |
| <b>Currently does your spouse live in the same residence with you?</b>         |
| <b>Does your spouse have high risk underlying medical conditions?</b>          |
| <b>Is your spouse showing symptoms of COVID-19?</b>                            |
| <b>Do you have a primary care provider?</b>                                    |

### **Symptom Survey Questions (Initial and Follow Up)**

#### **Vitals and Alarm Symptoms**

|                                                                                                     |
|-----------------------------------------------------------------------------------------------------|
| <b>Are you able to take your temperature at home?</b>                                               |
| <b>What is your current or most recent temperature?</b>                                             |
| <b>Since you have been sick with this illness, what is the highest temperature you've measured?</b> |
| <b>What was your most recent systolic blood pressure (top number) at home?</b>                      |
| <b>What was your most recent diastolic blood pressure (bottom number) at home?</b>                  |
| <b>If you are able to check your pulse ox at home, what is your current pulse ox?</b>               |
| <b>Do you need to use supplemental oxygen at home?</b>                                              |
| <b>Are you having such a hard time breathing that you are gasping for air and can barely talk?</b>  |
| <b>Do you have continuous or severe pain or pressure in your chest?</b>                             |
| <b>Have you been able to eat or drink anything in the last 12 hours?</b>                            |
| <b>Are you feeling so lightheaded that you fear you may pass out or faint if you stand up?</b>      |
| <b>Have you noticed or has anyone else noticed that you are confused or behaving strangely?</b>     |

#### **Non-Alarm Symptoms**

|                                                                  |
|------------------------------------------------------------------|
| <b>Please rate your symptoms overall.</b>                        |
| <b>Have you had a sore throat?</b>                               |
| <b>Have you had chills?</b>                                      |
| <b>Have you had body aches?</b>                                  |
| <b>Have you had sinus congestion?</b>                            |
| <b>Have you had loss of smell or taste?</b>                      |
| <b>Have you had cough?</b>                                       |
| <b>Have you had shortness of breath or difficulty breathing?</b> |
| <b>Do you get short of breath walking up 1 flight of stairs?</b> |

|                                                                             |
|-----------------------------------------------------------------------------|
| <b>Do you get short of breath walking between rooms or getting dressed?</b> |
| <b>Have you had any shortness of breath at rest?</b>                        |
| <b>Have you had any shortness of breath with exertion?</b>                  |
| <b>Have you had any wheezing?</b>                                           |
| <b>Have you had any chest tightness?</b>                                    |
| <b>Have you had any confusion?</b>                                          |
| <b>Have you had any dizziness when standing?</b>                            |
| <b>Have you had a headache?</b>                                             |
| <b>Have you had any diarrhea?</b>                                           |
| <b>Have you had any abdominal pain?</b>                                     |
| <b>Have you had any nausea?</b>                                             |
| <b>Have you had a rash?</b>                                                 |
