# Supplementary material for: Associations between remote patient monitoring programme responsiveness and clinical outcomes for patients with COVID-19
Source: PubMed Central journal article supplement — BMJ Open Qual. 2021 Sep 13;10(3):e001496. doi: 10.1136/bmjoq-2021-001496 (PMC8438571; doi:10.1136/bmjoq-2021-001496), 2021-09-13
Supplement: bmjoq-2021-001496supp002.pdf [file bmjoq-2021-001496supp002.pdf]

Supplemental Table 2. ICD-10 and SNOMED clinical terms used to determine patient characteristics accepted for emergency use authorization for monoclonal antibody use in COVID-19 patients.

| Diagnosis                                    | Corresponding Code / Clinical Term                                                                                                                                                              |                                                                                                                                                                                                                                                                                                                                 |
|----------------------------------------------|-------------------------------------------------------------------------------------------------------------------------------------------------------------------------------------------------|---------------------------------------------------------------------------------------------------------------------------------------------------------------------------------------------------------------------------------------------------------------------------------------------------------------------------------|
|                                              | ICD-10 Codes                                                                                                                                                                                    | SNOMED Clinical Term                                                                                                                                                                                                                                                                                                            |
| <b>Diabetes</b>                              | E08.2, E08.3, E08.4, E08.5, E09.2, E09.3, E09.4, E09.5, E09.6, E10.2, E10.3, E10.4, E10.5, E10.6, E11.2, E11.3, E11.4, E11.5, E11.6, E13.2, E13.3, E13.4, E13.5, E13.6, E08, E09, E10, E12, E13 | Score 1: include terms containing "diabet" but not "retin", "neuro", "kidney", "renal", "ulcer", "complic", "foot", "arth", "vascu"<br><br>Score 2: include terms containing "diabet" in addition to "retin", "neuro", "kidney", "renal", "ulcer", "complic", "foot", "arth", "vascu"<br>Exclude terms containing "prediabetes" |
| <b>Chronic Obstructive Pulmonary Disease</b> | J4, J6, J70                                                                                                                                                                                     | Include terms containing "emphysema", "asthma", "pulmonary fibrosis", "chronic obstructive", "chronic bronchitis"                                                                                                                                                                                                               |
| <b>Hypertension</b>                          | I1                                                                                                                                                                                              |                                                                                                                                                                                                                                                                                                                                 |
| <b>PVD</b>                                   | I70, I71, I73.1, I73.8, I73.9, I77.1, I79.0, I78.1, I79.8, K55.1, K55.8, K55.9, Z95.820, Z95.9                                                                                                  | Include terms containing "pvd", "peripheral arterial", "claudication" with "peripheral", "vascular"                                                                                                                                                                                                                             |
| <b>Myocardial Infarction</b>                 | I20, I21, I22, I23, I24, I25                                                                                                                                                                    | Include terms containing "myocardial infarction", "coronary disease", "ischemic cardiomyopathy", "myocardial ischemia"                                                                                                                                                                                                          |
| <b>Congestive Heart Failure</b>              | I11.0, I13.0, I13.2, I25.5, I42.0, I42.5, I42.6, I42.7, I42.8, I42.9, I43, I50, P29.0                                                                                                           | Include terms containing "congestive heart", "systolic failure", "diastolic failure", "chf"                                                                                                                                                                                                                                     |
