# Supplementary figures and images for: Associations between remote patient monitoring programme responsiveness and clinical outcomes for patients with COVID-19
Source: PubMed Central journal article supplement — BMJ Open Qual. 2021 Sep 13;10(3):e001496. doi: 10.1136/bmjoq-2021-001496 (PMC8438571; doi:10.1136/bmjoq-2021-001496), 2021-09-13

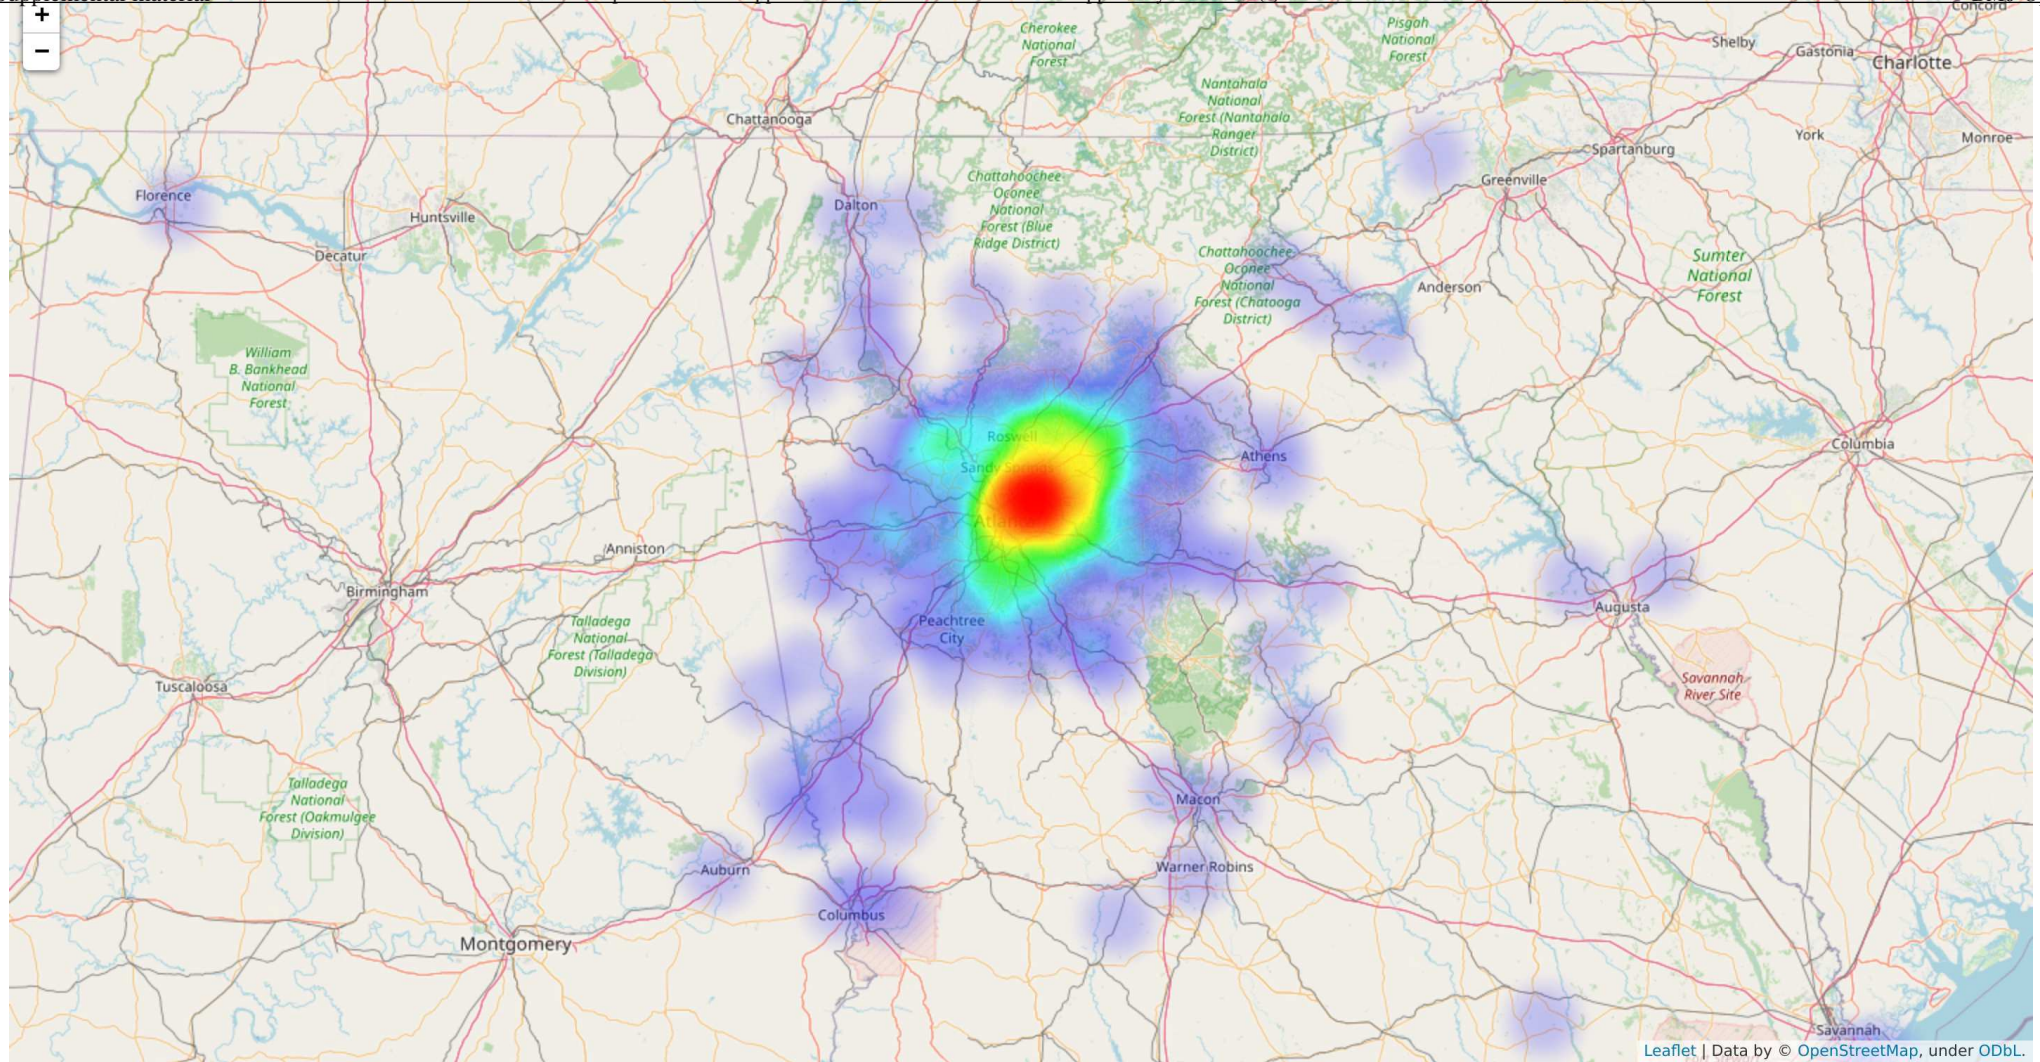

Supplement: bmjoq-2021-001496supp003.pdf [file bmjoq-2021-001496supp003.pdf]
